# Supplementary material
Source: PubMed Central journal article supplement (PMC4787677)
Supplement: nouf740902.wt2_default.pdf [file nouf740902.wt2_default.pdf]

**Appendix 1: Standardised form recording the care management protocols used every 6 months**

|    |                                                                |                             |                                                                                                                                                             |
|----|----------------------------------------------------------------|-----------------------------|-------------------------------------------------------------------------------------------------------------------------------------------------------------|
| 1  | Notification of diagnosis                                      | No <input type="checkbox"/> | Yes <input type="checkbox"/> - To whom:                                                                                                                     |
| 2  | Verification of patient and caregiver knowledge of the disease | No <input type="checkbox"/> | Yes <input type="checkbox"/> - Oral advice:<br>- Written documents:                                                                                         |
| 3  | Treatment modification required                                | No <input type="checkbox"/> | Yes <input type="checkbox"/> - Give details:                                                                                                                |
| 4  | Caregiver psychological and physical health                    | No <input type="checkbox"/> | Yes <input type="checkbox"/> - Oral advice:<br>- Written documents:<br>- Other (give details):                                                              |
| 5  | Nutritional status                                             | No <input type="checkbox"/> | Yes <input type="checkbox"/> - Oral advice:<br>- Written documents:<br>- Nutritional supplements:<br>- Dietician:<br>- Other (give details):                |
| 6  | Exercise training                                              | No <input type="checkbox"/> | Yes <input type="checkbox"/> - Oral advice:<br>- Written documents:<br>- Physiotherapist:<br>- Other (give details):                                        |
| 7  | Gait disorders and walking capacities                          | No <input type="checkbox"/> | Yes <input type="checkbox"/> - Oral advice:<br>- Witten documents:<br>- Physiotherapist :<br>- Medical equipment:<br>- Other (give details):                |
| 8  | Functional dependency                                          | No <input type="checkbox"/> | Yes <input type="checkbox"/> - Oral advice<br>- Written documents :<br>- Physiotherapist,<br>nurse, etc:<br>- Medical equipment:<br>- Other (give details): |
| 9  | Behavioural symptoms                                           | No <input type="checkbox"/> | Yes <input type="checkbox"/> - Oral advice:<br>- Written documents:<br>- Medical prescription:<br>- Other (give details):                                   |
| 10 | Depression                                                     | No <input type="checkbox"/> | Yes <input type="checkbox"/> - Oral advice:<br>- Written documents:<br>- Medical prescription:<br>- Other (give details):                                   |
| 11 | Sleep disorders                                                | No <input type="checkbox"/> | Yes <input type="checkbox"/> - Oral advice:<br>- Written documents:<br>- Medical prescription:<br>- Other (give details):                                   |
| 12 | Home help                                                      | No <input type="checkbox"/> | Yes <input type="checkbox"/> -Give details :                                                                                                                |
| 13 | Social benefits                                                | No <input type="checkbox"/> | Yes <input type="checkbox"/> -Give details :                                                                                                                |
| 14 | Legal protection of patient                                    | No <input type="checkbox"/> | Yes <input type="checkbox"/> -Give details :                                                                                                                |
| 15 | At risk of accidents when driving a car                        | No <input type="checkbox"/> | Yes <input type="checkbox"/> -Give details :                                                                                                                |
| 16 | Respite care                                                   | No <input type="checkbox"/> | Yes <input type="checkbox"/> -Give details :                                                                                                                |
| 17 | Decision to institutionalise the                               | No <input type="checkbox"/> | Yes <input type="checkbox"/> - Oral advice                                                                                                                  |

|    |         |                             |                                              |
|----|---------|-----------------------------|----------------------------------------------|
|    | patient |                             | - Written documents :                        |
| 18 | Others  | No <input type="checkbox"/> | Yes <input type="checkbox"/> -Give details : |
